# Supplementary material
Source: Springer Nature journal article supplement (http://publikationen.ub.uni-frankfurt.de/opus4/files/34572/12977_2013_3895_MOESM3_ESM.pdf)
Supplement: MOESM3 [file 12977_2013_3895_MOESM3_ESM.pdf]

*M* / kDa

NL4-3

*M* / kDa

NL4-3/ADA

*M* / kDa

ADA

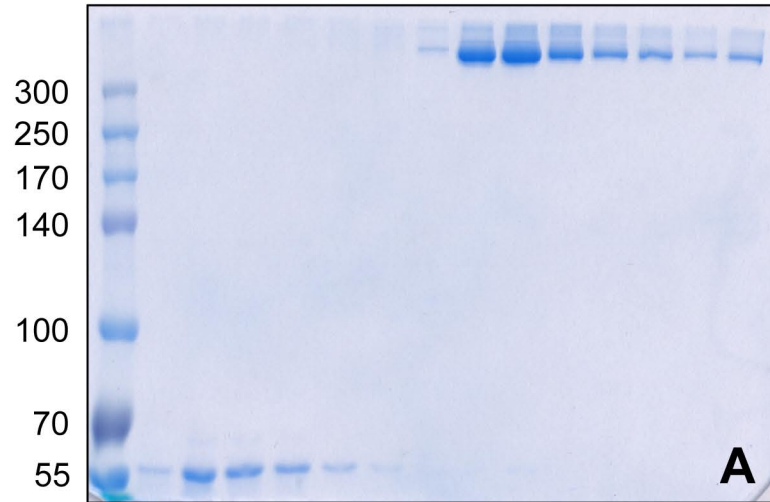

**A**

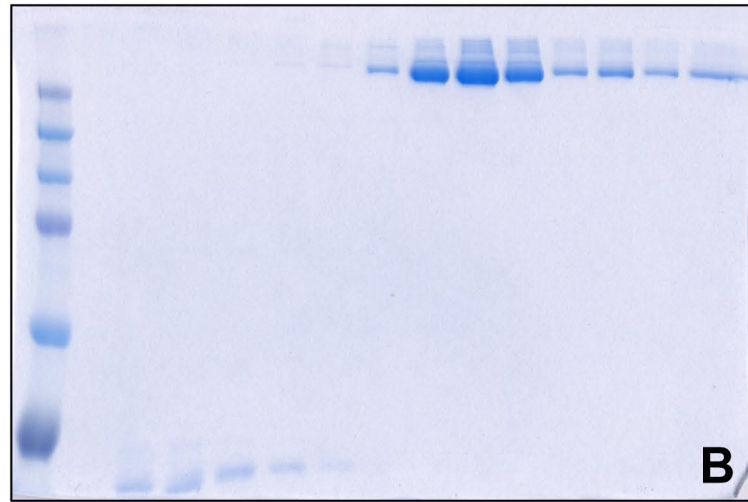

**B**

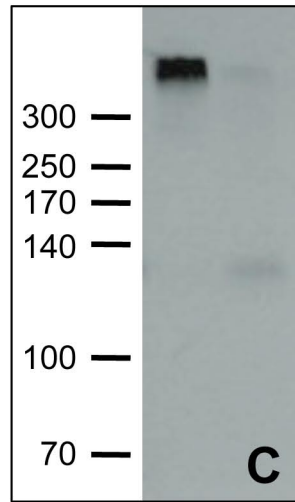

**C**

DTT: - +
